# Supplementary material for: A tool for repression of RNAi overcomes sterility and separates maternal from zygotic RNAi in Tribolium castaneum
Source: Research Square preprint supplement (doi:10.21203/rs.3.rs-7658464/v1), 2025-11-10
Supplement: Supplementary file 1 [file 1126ffbd92c4b924482efcfb.xlsx]

## Sheet: VSR-Transgenesis
No.	Plasmid Construct	Number of Injected Embryos	Hatched	Hatched Rate %	No of Crossing (G0)	No of Positive lines	Remarks
1	bhsp-KSeq-CrPV-P2A-GAL4D (Vnd-us)	500	134	26.8	102		CRISPR (upstream)
		800	*	*	166
2	bhsp-KSeq-CrPV-P2A-GAL4D (Vnd-i1)	500	136	27.2	107	1 positive	CRISPR (intron-1)
		800	*	*	158	2 positives
3	pUbp-KSeq-CrPV-P2A-EGFP-SV40	1000	293	29.3	185	1 positive	PiggyBac
		350	*	*	163	2 positives
4	GAPDH-KSeq-CrPV-P2A-EGFP-SV40	1000	28	2.8	5		PiggyBac
		500	124	24.8	88	1 positive	PiggyBac+dsRNA EGFP
		350	*	*	94	1 positive	PiggyBac+dsRNA EGFP
5	GAPDH-pUbp-KSeq-CrPV-P2A-EGFP-SV40	1000	34	3.4	7		PiggyBac
		500	130	26	52		PiggyBac+dsRNA EGFP
		700	*	*	38	1 positive	PiggyBac+dsRNA EGFP
6	pUbp-KSeq-CrPV-P2A-CrPV(opt)-P2A-EGFP-SV40	1000	32	3.2	24	2 positives	PiggyBac
7	GAPDH-KSeq-CrPV-P2A-CrPV(opt)-P2A-EGFP-SV40	1000	42	4.2	27		PiggyBac+dsRNA EGFP
8	AlphaTubP-CrPV-SV40	*	*	*	*	*
	*Hatch rate was not scored.

## Sheet: VSR Lethality
VSR-Lines ID	Constructs	Fitness		Plasmid Construct	Hatched animals	Hatch Rate %	Remark / explanation
L1	bhsp-KSeq-CrPV-P2A-GAL4D (Vnd-i1)	Healthy		Buffer Injections	135	40.2985	Control Buffer Injections
L2	GAPDH-KSeq-CrPV-P2A-EGFP-SV40	Healthy		pUbp-VSR	293	29.3	PiggyBac
L3	pUbp-KSeq-CrPV-P2A-CrPV(opt)-P2A-EGFP-SV40	Unhealthy		GAPDH-VSR	28	2.8	PiggyBac
L4	pUbp-KSeq-CrPV-P2A-CrPV(opt)-P2A-EGFP-SV40	Unhealthy		GAPDH-pUbp-VSR	34	3.4	PiggyBac
L5	bhsp-KSeq-CrPV-P2A-GAL4D (Vnd-i1)	Unhealthy		GAPDH-VSR-dsRNA	124	24.8	PiggyBac+dsRNA EGFP
L6	bhsp-KSeq-CrPV-P2A-GAL4D (Vnd-i1)	Healthy		GAPDH-pUbp-VSR-dsRNA	130	26	PiggyBac+dsRNA EGFP
L7	pUbp-KSeq-CrPV-P2A-EGFP-SV40	Healthy		pUbp-VSR-(Bi)	32	3.2	PiggyBac
L8	pUbp-KSeq-CrPV-P2A-EGFP-SV40	Unhealthy		GAPDH-VSR(Bi)-dsRNA	42	4.2	PiggyBac+dsRNA EGFP
L9	pUbp-KSeq-CrPV-P2A-EGFP-SV40	Healthy
L10	GAPDH-KSeq-CrPV-P2A-EGFP-SV40	Unhealthy
L11	GAPDH-pUbp-KSeq-CrPV-P2A-EGFP-SV40	Unhealthy
L12	Alpha-VSR (GB-254)	Healthy
