# Supplementary material for: A tool for repression of RNAi overcomes sterility and separates maternal from zygotic RNAi in Tribolium castaneum
Source: Research Square preprint supplement (doi:10.21203/rs.3.rs-7658464/v1), 2025-11-10
Supplement: Supplementary file 2 [file 759181391094b5f53ec8054c.xlsx]

## Sheet: Heatshock Experiment Axin RNAi
Axin heat-shock experiment (heat-shock 10-13/ 13-16h AEL)								Summary
Phenotypes	EL-1 (-)	EL-1 (+)	EL-2 (-)	EL-2 (+)	EL-3 (-)	EL-3 (+)		Phenotypes	No Heatshock	Heatshock	%
WT	0	2	0	2	0	5		WT	15	20	20.4082
EE	73	2	50	0	45	1		EE	402	30	30.6122
Cuticle Crumbs	0	1	0	1	1	0		Cuticle Crumbs	95	14	14.2857
Double Abdomen	0	0	0	3	0	3		Double Abdomen	0	7	7.14286
Double Abdomen with DCD	0	0	0	1	0	0		Head Defects	0	27	27.551
Head Defects	0	3	0	0	0	5
Sum	73	8	50	7	46	14		Sum	512	98
Axin heat-shock experiment (heat-shock 10-13/ 13-16h AEL)
Phenotypes	EL-1 (-)	EL-1 (+)	EL-2 (-)	EL-2 (+)	EL-3 (-)	EL-3 (+)		Explanation:
WT	9	2	2	9	4	0		For No Heat shock (-) overnight egg lay was used for cuticle prep to have many embryos for analysis.
EE	102	17	72	5	60	5		EL-1: Egg Lay 1 and so on.
Cuticle Crumbs	8	3	34	6	52	3
Double Abdomen	0	0	0	0	0	0
Double Abdomen with DCD	0	0	0	0	0	0
Head Defects	0	7	0	7	0	5
Sum	119	29	108	27	116	13
