# Supplementary material for: A tool for repression of RNAi overcomes sterility and separates maternal from zygotic RNAi in Tribolium castaneum
Source: Research Square preprint supplement (doi:10.21203/rs.3.rs-7658464/v1), 2025-11-10
Supplement: Supplementary file 3 [file 778a0d80b515451de05d01b5.xlsx]

## Sheet: Paired
Replication-1		Vnd-VSR			pUB-VSR			pUB-VSR-VSR		GAP-VSR		GAP-pUB-VSR	Alp-VSR
Phenotypes	WT	L1	L5	L6	L7	L8	L9	L3	L4	L2	L10	L11	L12	line ID
Wild Type	0	6	0	1	0	x	0	0	0	0	x	0	0
Empty Eggs	3	8	0	1	5	x	2	0	2	2	x	2	4
Cuticle Crumbs	0	0	0	3	1	x	3	0	3	1	x	1	1
Complete Pairwise Deletion (4 abd seg)	14	3	0	0	5	x	3	0	11	7	x	6	1
Pairwise Deletion (5 abd seg)	6	1	0	6	7	x	15	0	9	10	x	14	5
Pairwise Deletion (6 or more abd seg)	0	8	0	14	12	x	1	0	0	2	x	2	4
Replication-2		Vnd-VSR			pUB-VSR			pUB-VSR-VSR		GAP-VSR		GAP-pUB-VSR	Alp-VSR
Phenotypes	WT	L1	L5	L6	L7	L8	L9	L3	L4	L2	L10	L11	L12	line ID
Wild Type	0	4	0	3	0	x	0	0	1	0	x	1	0
Empty Eggs	8	7	1	0	1	x	9	0	3	5	x	3	4
Cuticle Crumbs	2	0	0	0	2	x	1	0	1	0	x	1	1
Complete Pairwise Deletion (4 abd seg)	11	4	0	0	0	x	2	0	9	14	x	2	2
Pairwise Deletion (5 abd seg)	5	0	0	3	6	x	12	0	5	5	x	9	5
Pairwise Deletion (6 or more abd seg)	0	11	0	16	9	x	4	0	1	1	x	2	11
Summary	WT	Vnd-VSR			pUB-VSR			pUB-VSR-VSR		GAP-VSR		GAP-pUB-VSR	Alp-VSR
Phenotypes		L1	L5	L6	L7	L8	L9	L3	L4	L2	L10	L11	L12
Complete Pairwise Deletion (4 abd seg)	25	7	0	0	5	0	5	0	20	21	0	8	3	Strong Phenotype
Pairwise Deletion (5 abd seg)	11	1	0	9	13	0	27	0	14	15	0	23	10	Medium Phenotype
Pairwise Deletion (6 or more abd seg)	0	19	0	30	21	0	5	0	1	3	0	4	15	Weak Phenotype
Summary		Vnd-VSR			pUB-VSR			pUB-VSR-VSR		GAP-VSR		GAP-pUB-VSR	Alp-VSR
	WT	L1	L5	L6	L7	L8	L9	L3	L4	L2	L10	L11	L12
Rescue Effect
x: not scored because of unhealthy line
L1-12: ID of transgenic lines (see suppl. table 1)
No Rescue	Strong Phenotype more than 50%
Partial Rescue	Strong Phenotype less than 50%
Strong Rescue	Weak Phenotype more than 50%
	Unhealthy line/No Pupae for Injections

## Sheet: Eve
Replication-1		Vnd-VSR			pUB-VSR			pUB-VSR-VSR		GAP-VSR		GAP-pUB-VSR	Alp-VSR
Phenotypes	WT	L1	L5	L6	L7	L8	L9	L3	L4	L2	L10	L11	L12	line ID
Wild Type	0	0	0	0	0	x	0	0	1	0	x	0	0
Empty Eggs	8	6	0	0	0	x	0	3	6	5	x	3	2
Cuticle Crumbs	0	0	0	1	0	x	1	0	1	2	x	0	0
Thorax reduction (1 Segment present)	5	1	0	1	2	x	3	2	12	5	x	4	3
Thorax reduction (2 Segments or more present)	0	0	0	0	1	x	4	6	0	4	x	4	6
Anterior body defect (4 abd segments)	4	0	0	0	1	x	4	1	2	3	x	3	2
Anterior body defect (6 or more abd segments)	3	0	0	1	2	x	5	9	13	6	x	8	5
Replication-2		Vnd-VSR			pUB-VSR			pUB-VSR-VSR		GAP-VSR		GAP-pUB-VSR	Alp-VSR
Phenotypes	WT	L1	L5	L6	L7	L8	L9	L3	L4	L2	L10	L11	L12	line ID
Wild Type	0	0	0	1	0	x	0	0	1	0	x	0	0
Empty Eggs	5	4	3	8	4	x	5	5	6	8	x	1	5
Cuticle Crumbs	0	0	1	0	0	x	0	0	0	1	x	0	0
Thorax reduction (1 Segment present)	7	1	0	1	0	x	5	5	8	5	x	0	5
Thorax reduction (2 Segments or more present)	0	0	0	0	1	x	3	0	6	6	x	0	6
Anterior body defect (4 abd segments)	2	0	0	0	0	x	0	1	1	5	x	0	1
Anterior body defect (6 or more abd segments)	4	0	0	1	1	x	8	4	12	6	x	0	10
Summary	WT	Vnd-VSR			pUB-VSR			pUB-VSR-VSR		GAP-VSR		GAP-pUB-VSR	Alp-VSR
Phenotypes		L1	L5	L6	L7	L8	L9	L3	L4	L2	L10	L11	L12	line ID
Thorax reduction (1 Segment present)	12	2	0	2	2	0	8	7	20	10	0	4	8	Strong Phenotype
Thorax reduction (2 Segments or more present)	0	0	0	0	2	0	7	6	6	10	0	4	12	Weak Phenotype
Anterior body defect (4 abd segments)	6	0	0	0	1	0	4	2	3	8	0	3	3
Anterior body defect (6 or more abd segments)	7	0	0	2	3	0	13	13	25	12	0	8	15
Summary		Vnd-VSR			pUB-VSR			pUB-VSR-VSR		GAP-VSR		GAP-pUB-VSR	Alp-VSR
	WT	L1	L5	L6	L7	L8	L9	L3	L4	L2	L10	L11	L12
Rescue Effect
No Rescue	Strong Thoracic Phenotype more than 50%
Partial Rescue	Both Strong and Weak Phenotype almost equal
Strong Rescue	Weak Thoracic Phenotype more than 50%
	Unhealthy line/No Pupae for Injections

## Sheet: HH
Replication-1		Vnd-VSR			pUB-VSR	GAP-VSR	Alp-VSR
Phenotypes	WT	L1	L5	L6	L7	L2	L12	line ID
Wild Type	0	27	11	30	29	2	9
Empty Eggs	8	2	0	0	0	8	8
Round Cuticle Phenotype	24	0	0	0	0	14	0
Thoracic Segments Present	1	0	0	0	0	1	0
Thoracic & Abdomen Segments Present (Head Phenotype)	0	0	0	0	0	3	11
Replication-2		Vnd-VSR			pUB-VSR	GAP-VSR	Alp-VSR
Phenotypes	WT	L1	L5	L6	L7	L2	L12	line ID
Wild Type	0	24	13	27	33	6	11
Empty Eggs	10	4	0	0	0	9	10
Round Cuticle Phenotype	27	0	0	0	0	15	0
Thoracic Segments Present	0	0	0	0	0	3	0
Thoracic & Abdomen Segments Present (Head Phenotype)	0	0	0	0	0	6	14
Summary	WT	Vnd-VSR			pUB-VSR	GAP-VSR	Alp-VSR
Phenotypes		L1	L5	L6	L7	L2	L12
Wild Type	0	51	24	57	62	8	20	Complete Rescue
Empty Eggs	18	6	0	0	0	17	18	Strong Phenotype
Round Cuticle Phenotype	51	0	0	0	0	29	0	Strong Phenotype
Thoracic Segments Present	1	0	0	0	0	4	0	Weak Pheotype
Thoracic & Abdomen Segments Present (Head Phenotype)	0	0	0	0	0	9	25	Weak Pheotype
Summary		Vnd-VSR			pUB-VSR	GAP-VSR	Alp-VSR
	WT	L1	L5	L6	L7	L2	L12
Rescue Effect
No Rescue	Strong Phenotype more than 50%
Partial Rescue	Weak Phenotype more than 50%
Strong Rescue	Complete Rescue (Wild Type) more than 50%
