# Supplementary material for: A tool for repression of RNAi overcomes sterility and separates maternal from zygotic RNAi in Tribolium castaneum
Source: Research Square preprint supplement (doi:10.21203/rs.3.rs-7658464/v1), 2025-11-10
Supplement: Supplementary file 4 [file 97376242db6ee0ad304d00d6.xlsx]

## Sheet: Axin RNAi
Replicate-1		Vnd-VSR			pUB-VSR			pUB-VSR-VSR		GAP-VSR		GAP-pUB-VSR	Alp-VSR
Phenotypes	WT	L1	L5	L6	L7	L8	L9	L3	L4	L2	L10	L11	L12	line ID
Empty Eggs	2	0	1	1	0		0			1		3	33
Cuticle Crumbs	1	0	0	0	3		0			1		1	24
Double Abdomen	0	1	0	0	0		0			0		0	0
Head Phenotype	0	1	0	0	0		0			0		0	0
Total	3	2	1	1	3	0	0	0	0	2	0	4	57
Replicate-2		Vnd-VSR			pUB-VSR			pUB-VSR-VSR		GAP-VSR		GAP-pUB-VSR	Alp-VSR
Phenotypes	WT	L1	L5	L6	L7	L8	L9	L3	L4	L2	L10	L11	L12	line ID
Empty Eggs	0	0	2	1	1		1			3		2	24
Cuticle Crumbs	1	2	0	0	2		0			1		2	20
Double Abdomen	0	1	0	0	0		0			0		0	0
Head Phenotype	0	0	0	0	0		0			0		0	0
Total	1	3	2	1	3	0	1	0	0	4	0	4	44
Total R1+R2		Vnd-VSR			pUB-VSR			pUB-VSR-VSR		GAP-VSR		GAP-pUB-VSR	Alp-VSR
	WT	L1	L5	L6	L7	L8	L9	L3	L4	L2	L10	L11	L12
	4	5	3	2	6		1			6		8	101
L1-L12: IDs of transgenic lines - see suppl. table 1
No Rescue	almost equal or less embryos compared to WT
Partial Rescue	Two fold increase compared to WT
Strong Rescue	Three or more fold increase compared to WT
	Unhealthy line/No Pupae for Injections

## Sheet: Dpp RNAi
Phenotypes	WT	pUB-VSR (L7)	GAP-VSR (L2)	Alp-VSR (L12)
Empty Eggs	3	5	1	76
Cuticle Crumbs	0	0	0	1
Inside Out	0	0	0	1
Dorsal Closure	0	0	0	2
Total	3	5	1	80
Phenotypes	WT	pUB-VSR (L7)	GAP-VSR (L2)	Alp-VSR (L12)
Empty Eggs	2	2	1	84
Cuticle Crumbs	0	0	0	0
Inside Out	0	0	0	2
Dorsal Closure	0	0	0	3
Total	2	2	1	89
Total R1+R2	WT	pUB-VSR (L7)	GAP-VSR (L2)	Alp-VSR (L12)
	5	7	2	169
No Rescue	Almost equal or less embryos compared to WT
Partial Rescue	Two fold increase compared to WT
Strong Rescue	Three or more fold increase compared to WT

## Sheet: Summary
		Wild Type	Alpha-VSR		Egg Collection From 16 Survived Female Pupae at D9
	Axin-RNAi	4	101
	Dpp-RNAi	5	169
